# Supplementary material
Source: PubMed Central journal article supplement (PMC3514743)
Supplement: neo1411_1032SD1.pdf [file neo1411_1032SD1.pdf]

**Table W1.** Specific shRNA Silencing Sequences.

| Number*     | Target Gene | Sequence               | TRC Number <sup>†</sup> |
|-------------|-------------|------------------------|-------------------------|
| I           | PACE4       | CGGGTCATAAAGTTAGCCATT  | TRCN0000075248          |
| II          |             | GCGTGGATGAACCTGAGAAAT  | TRCN0000075249          |
| <b>III</b>  |             | CCTGGAAGATTACTACCATTT  | TRCN0000075250          |
| IV          |             | CCACGATATGATGCCAGCAAT  | TRCN0000075251          |
| V           |             | GAGTGCATTCACTGTGCGAAA  | TRCN0000075252          |
| <b>VI</b>   | Furin       | CCTGTCCCTCTAAAGCAATAA  | TRCN0000075238          |
| VII         |             | CCGCCTTTATCAAAGACCAGA  | TRCN0000075239          |
| VIII        |             | CAGTATCTACACGCTGTCCAT  | TRCN0000075240          |
| IX          |             | GAGTGGGTCCCTAGAGATTGAA | TRCN0000075241          |
| X           |             | CCACATGACTACTCCGCAGAT  | TRCN0000075242          |
| XI          | PC7         | GCCTCCATTATCCATTCCCAA  | TRCN0000072393          |
| XII         |             | GCACTATCAGATCAATGACAT  | TRCN0000072394          |
| <b>XIII</b> |             | CGCATGCCTTTCTATGCAGAA  | TRCN0000072395          |
| XIV         |             | CTGGACATCTGTCCCTTACTT  | TRCN0000072396          |
| XV          |             | CCAGGACATTGCACCCAACATA | TRCN0000072397          |

shRNAs in **bold** are the ones selected for this study because of their higher efficiency.

\*shRNA numbers used for Figure W1.

<sup>†</sup>TRC number from Sigma–Aldrich for human genes.

**Table W2.** qPCR Primer Sequences.

| Gene         | Protein | Primer Sequences                                                             | Product Size (bp) |
|--------------|---------|------------------------------------------------------------------------------|-------------------|
| <i>ACTB</i>  | β-Actin | Forward: 5'-CAGAGCCTCGCCTTTGCCGATC-3'<br>Reverse: 5'-CGATGCCGTGCTCGATGGGG-3' | 280               |
| <i>PCSK3</i> | Furin   | Forward: 5'-GTGGCGACCTGGCCATCCAC-3'<br>Reverse: 5'-AGGTACGGGCAGCCCCTCAG-3'   | 251               |
| <i>PCSK6</i> | PACE4   | Forward: 5'-CACCTGCTAGTGAAGACATCC-3'<br>Reverse: 5'-AACGAGAGCTTCTGCGTCCAC-3' | 122               |
| <i>PCSK7</i> | PC7     | Forward: 5'-GGGTCACCAACGAGGCAGGC-3'<br>Reverse: 5'-CCCCCAGCATCGCACAGTGG-3'   | 391               |
| <i>EGFR</i>  | EGFR    | Forward: 5'-CCTGGTCTGGAAGTACGCAG-3'<br>Reverse: 5'-GCGATGGACGGGATCTTAGG-3'   | 126               |

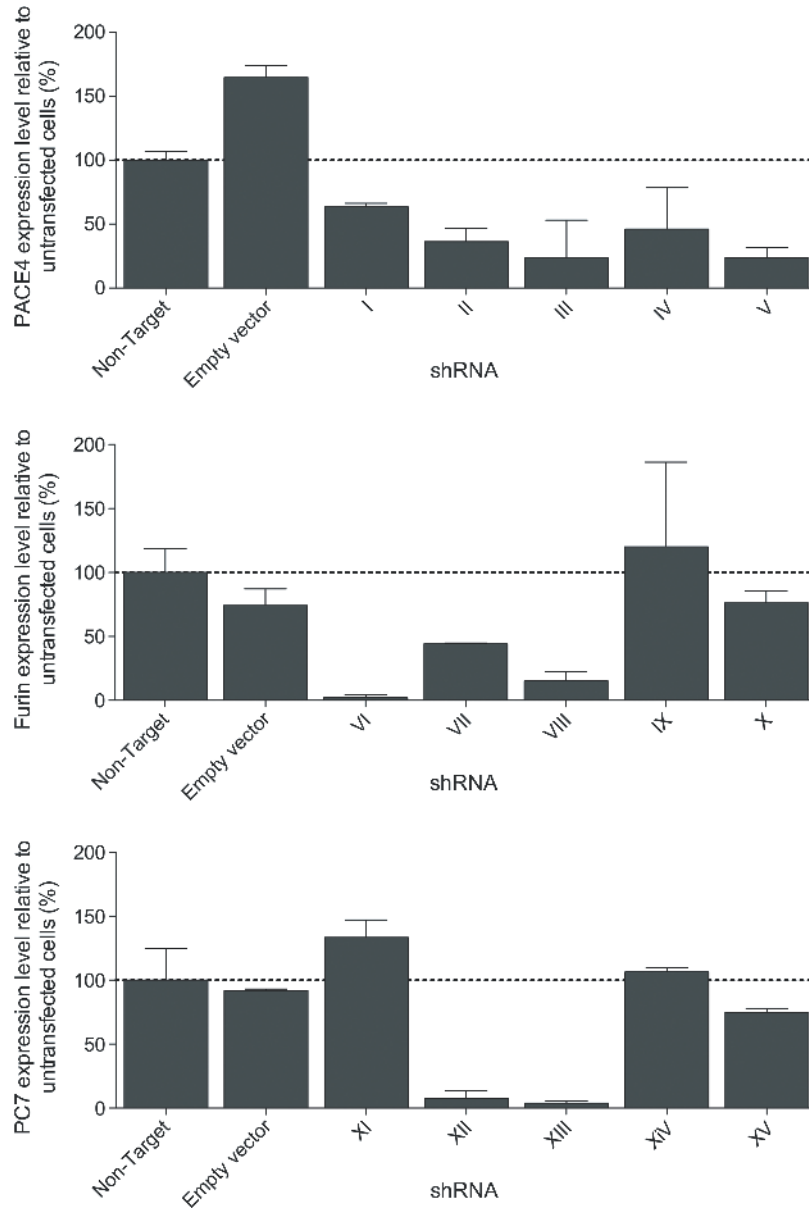

**Figure W1.** shRNA efficiency screening on DU145 cells. Northern blot hybridization densitometry of furin, PACE4, and PC7 mRNA relative to 18S RNA on total mRNA extracted from DU145 transfectants for the five shRNAs targeting furin (top), PACE4 (middle), and PC7 (bottom). Radioactive probes used are the same as in [10] (for shRNA numbers, refer to Table W1).

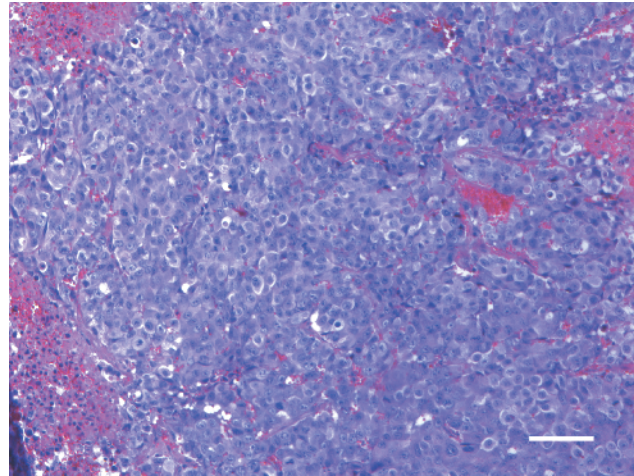

**Figure W2.** H&E staining on LNCaP tumors. H&E staining confirms the high vascularization of LNCaP tumor (NT on this picture), as multiple erythrocytes can be observed (red cells lacking purple nucleus) among the tumor cells within the tumors. Scale bar represents 100  $\mu\text{m}$ .
